# Supplementary material for: Donor-stabilised molecular Mg/Al-bimetallic hydrides
Source: Royal Society of Chemistry journal article supplement (doi:10.1039/c8dt03343a), 2018-01-01
Supplement: c8dt03343a1.pdf [file c8dt03343a1.pdf]

## Supporting Information

### Donor-stabilized molecular Mg/Al-bimetallic hydrides

Christoph Stuhl, Markus M. Katzenmayer, Cäcilia Maichle-Mössmer and Reiner Anwander\*

Institut für Anorganische Chemie, Eberhard Karls Universität Tübingen, Auf der Morgenstelle 18, 72076  
Tübingen, Germany

\*To whom correspondence should be addressed. E-mail: [reiner.anwander@uni-tuebingen.de](mailto:reiner.anwander@uni-tuebingen.de)

# Table of Contents

|                                                                                                                     |         |
|---------------------------------------------------------------------------------------------------------------------|---------|
| <b>Table S1.</b> Crystallographic data for compounds <b>1</b> , <b>2</b> , <b>3</b> , <b>4</b> , and <b>5</b> ..... | S3      |
| <b>General procedure for the hydromagnesation of 1-hexene.</b> .....                                                | S4      |
| <b>Table S2.</b> Reaction conditions for hydromagnesation reactions .....                                           | S4      |
| <b>Notes on NMR spectroscopic characterisation</b> .....                                                            | S4      |
| <b>Figure S1/S2.</b> NMR spectra of <b>1</b> .....                                                                  | S5      |
| <b>Figure S3/S4.</b> NMR spectra of <b>2</b> .....                                                                  | S6      |
| <b>Figure S5/S6.</b> NMR spectra of <b>3</b> .....                                                                  | S7      |
| <b>Figure S7/S8.</b> NMR spectra of <b>4</b> .....                                                                  | S8      |
| <b>Figure S9.</b> <sup>1</sup> H EXSY NMR spectrum of <b>4</b> .....                                                | S9      |
| <b>Figure S10-S12.</b> NMR spectra of <b>5</b> .....                                                                | S9-S10  |
| <b>Figure S13.</b> NMR spectrum of HCp' protonolysis with <b>1</b> .....                                            | S11     |
| <b>Figure S14-S16.</b> NMR spectra of reduction of pyridine .....                                                   | S11-S12 |
| <b>Figure S17/S18.</b> NMR spectra of hydromagnesation with <b>1</b> .....                                          | S13     |
| <b>Figure S19/S20.</b> NMR spectra of hydromagnesation with <b>3</b> .....                                          | S14     |
| <b>Figure S21/S22.</b> NMR spectra of hydromagnesation with <b>4</b> .....                                          | S15     |

**Table S1.** Crystallographic data for compounds **1**, **2**, **3**, **4**, and **5**

|                                                         | <b>1</b>                                                         | <b>2</b>                                                         | <b>3</b>                                                         | <b>4</b>                                                                       | <b>5</b>                                                                |
|---------------------------------------------------------|------------------------------------------------------------------|------------------------------------------------------------------|------------------------------------------------------------------|--------------------------------------------------------------------------------|-------------------------------------------------------------------------|
| formula                                                 | C <sub>26</sub> H <sub>60</sub> MgAl <sub>2</sub> O <sub>5</sub> | C <sub>18</sub> H <sub>50</sub> MgAl <sub>2</sub> O <sub>3</sub> | C <sub>14</sub> H <sub>40</sub> MgAl <sub>2</sub> O <sub>4</sub> | C <sub>30</sub> H <sub>84</sub> Al <sub>4</sub> Mg <sub>2</sub> O <sub>2</sub> | C <sub>21</sub> H <sub>41</sub> AlMgO <sub>2</sub>                      |
| M <sub>r</sub> [g mol <sup>-1</sup> ]                   | 531.01                                                           | 392.85                                                           | 350.73                                                           | 665.51                                                                         | 376.83                                                                  |
| CCDC                                                    | 1853436                                                          | 1853437                                                          | 1853438                                                          | 1853439                                                                        | 1853440                                                                 |
| color                                                   | colorless/block                                                  | colorless/block                                                  | colorless/block                                                  | colorless/plate                                                                | colorless/plate                                                         |
| crystal dimensions [mm]                                 | 0.433 x 0.166 x 0.157                                            | 0.718 x 0.506 x 0.456                                            | 0.819 x 0.608 x 0.483                                            | 0.347 x 0.136 x 0.094                                                          | 0.287 x 0.282 x 0.218                                                   |
| cryst. syst.                                            | triclinic                                                        | monoclinic                                                       | orthorhombic                                                     | monoclinic                                                                     | orthorhombic                                                            |
| space group                                             | <i>P</i> $\bar{1}$                                               | <i>P</i> 2 <sub>1</sub> / <i>c</i>                               | <i>Pna</i> 2 <sub>1</sub>                                        | <i>P</i> 2 <sub>1</sub> / <i>n</i>                                             | <i>P</i> 2 <sub>1</sub> <i>P</i> 2 <sub>1</sub> <i>P</i> 2 <sub>1</sub> |
| <i>a</i> [Å]                                            | 9.554(3)                                                         | 22.886(3)                                                        | 17.8880(4)                                                       | 10.4747(7)                                                                     | 9.746(5)                                                                |
| <i>b</i> [Å]                                            | 12.015(4)                                                        | 12.4234(17)                                                      | 8.6400(2)                                                        | 14.0615(9)                                                                     | 15.225(8)                                                               |
| <i>c</i> [Å]                                            | 15.069(5)                                                        | 18.993(3)                                                        | 14.9623(3)                                                       | 15.7685(10)                                                                    | 15.880(9)                                                               |
| $\alpha$ [°]                                            | 90.875(6)                                                        | 90                                                               | 90                                                               | 90                                                                             | 90                                                                      |
| $\beta$ [°]                                             | 92.171(6)                                                        | 91.203(5)                                                        | 90                                                               | 95.423(4)                                                                      | 90                                                                      |
| $\gamma$ [°]                                            | 104.872(6)                                                       | 90                                                               | 90                                                               | 90                                                                             | 90                                                                      |
| <i>V</i> [Å <sup>3</sup> ]                              | 1670.1(10)                                                       | 5398.9(13)                                                       | 2312.46(9)                                                       | 2312.1(3)                                                                      | 2357(2)                                                                 |
| <i>Z</i>                                                | 2                                                                | 8                                                                | 4                                                                | 2                                                                              | 4                                                                       |
| <i>T</i> [K]                                            | 100(2)                                                           | 100(2)                                                           | 100(2)                                                           | 100(2)                                                                         | 150(2)                                                                  |
| $\rho_{\text{calc}}$ [g cm <sup>-3</sup> ]              | 1.056                                                            | 0.967                                                            | 1.007                                                            | 0.956                                                                          | 1.062                                                                   |
| $\mu$ [mm <sup>-1</sup> ]                               | 0.134                                                            | 0.142                                                            | 0.162                                                            | 0.153                                                                          | 0.123                                                                   |
| F (000)                                                 | 588                                                              | 1760                                                             | 776                                                              | 744                                                                            | 832                                                                     |
| $\theta$ range [°]                                      | 1.353/26.498                                                     | 2.0105/11.34                                                     | 2.277/28.270                                                     | 3.416/22.49                                                                    | 2.4495/29.485                                                           |
| unique reflns                                           | 6875                                                             | 11724                                                            | 5493                                                             | 5730                                                                           | 5419                                                                    |
| observed reflns ( <i>I</i> >2 $\sigma$ )                | 4676                                                             | 9507                                                             | 5337                                                             | 4074                                                                           | 5219                                                                    |
| R1/ <i>w</i> R2 ( <i>I</i> >2 $\sigma$ ) <sup>[a]</sup> | 0.0859/0.1946                                                    | 0.0649/0.1533                                                    | 0.0243/0.0645                                                    | 0.0449/0.1028                                                                  | 0.0313/0.0837                                                           |
| R1/ <i>w</i> R2 (all data) <sup>[a]</sup>               | 0.1286/0.2143                                                    | 0.0890/0.1693                                                    | 0.0253/0.0651                                                    | 0.10742/0.1173                                                                 | 0.0331/0.0854                                                           |
| GOF <sup>[a]</sup>                                      | 1.064                                                            | 1.053                                                            | 1.020                                                            | 1.027                                                                          | 1.075                                                                   |

[a]  $R1 = \sum(|F_o| - |F_c|) / \sum |F_o|$ ,  $F_o > 4\sigma(F_o)$ .  $wR2 = \{\sum[w(F_o^2 - F_c^2)^2] / \sum[w(F_o^2)]\}^{1/2}$ .

**General procedure for the hydromagnesation of 1-hexene.** The metal hydrides were weighed into a vial and dissolved or suspended in 0.3 ml toluene- $d_8$ . To increase the solubility of the hydrides **3** and **4** two drops of THF- $d_8$  were added. 1-Hexene was dissolved in a second vial in 0.3 ml toluene- $d_8$ . The solutions were transferred and combined into a *J. Young* valve NMR sample tube and monitored by  $^1\text{H}$  NMR spectroscopy. The reactions were heated carefully in steps of 10 °C until a reaction took place at 130 °C. After 16 h the reactions were stopped and in case of **1** heated again for additional 24 h. All reactions produced  $[\text{MgH}_2]_n$  as a white precipitate.

**Table S2.** Reaction conditions for hydromagnesation reactions

| Substrate                                | 1-hexene                      | $T$ [° C] | time [h]    | Yield $\text{Mg}(n\text{-hex})_2$ |
|------------------------------------------|-------------------------------|-----------|-------------|-----------------------------------|
| <b>1</b> , 20.0 mg, 43.6 $\mu\text{mol}$ | 7.34 mg, 87.2 $\mu\text{mol}$ | 130       | 16 h (40 h) | 14% (19%)                         |
| <b>3</b> , 20.0 mg, 57.1 $\mu\text{mol}$ | 9.61 mg, 114 $\mu\text{mol}$  | 130       | 16 h        | 6%                                |
| <b>4</b> , 20.0 mg, 30.1 $\mu\text{mol}$ | 10.1 mg, 120 $\mu\text{mol}$  | 130       | 16 h        | 2%                                |

**Notes on NMR spectroscopic characterisation.**

Due to the limited solubility of **3** in toluene- $d_8$  two drops of THF- $d_8$  were added.

\* residual solvent peak

~ reduced peak intensity

## NMR Spectra

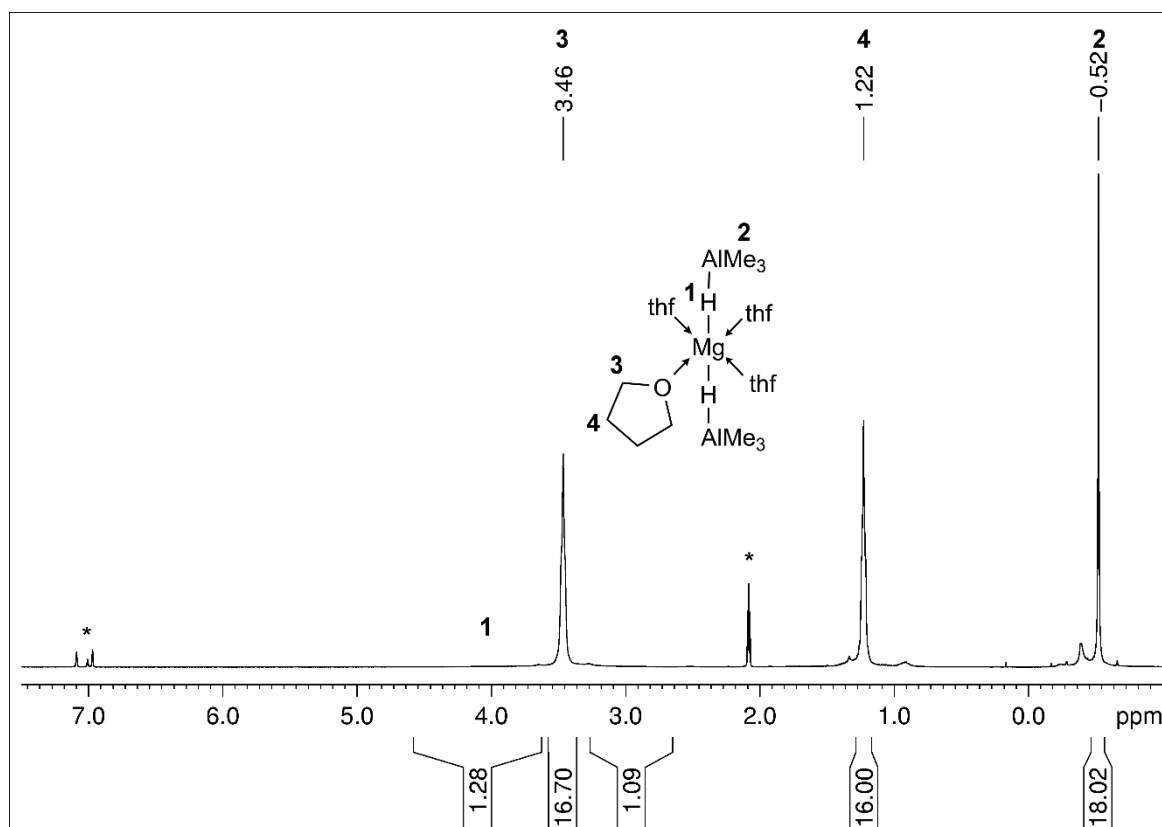

**Figure S1.**  $^1\text{H}$  NMR spectrum (400 MHz) of **1** in  $\text{toluene-}d_8$  at  $26^\circ\text{C}$ .

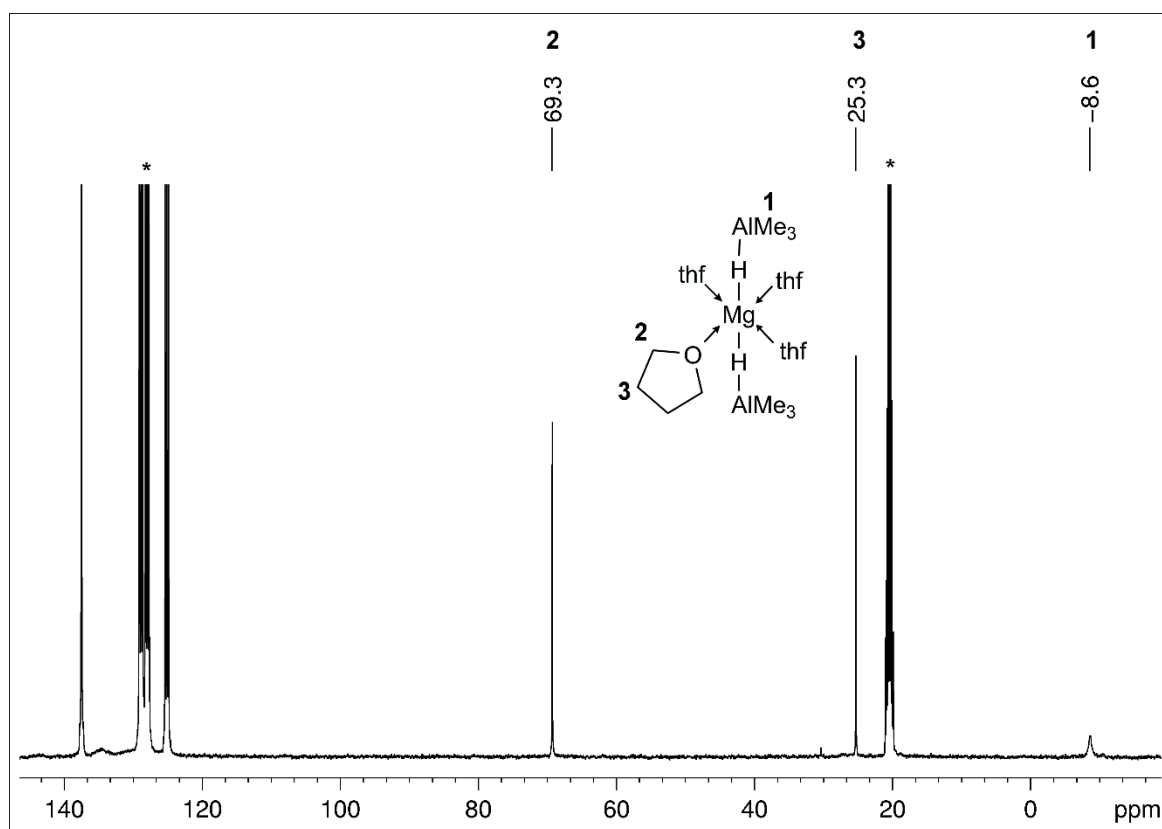

**Figure S2.**  $^{13}\text{C}\{^1\text{H}\}$  NMR spectrum (101 MHz) of **1** in  $\text{toluene-}d_8$  at  $26^\circ\text{C}$ .

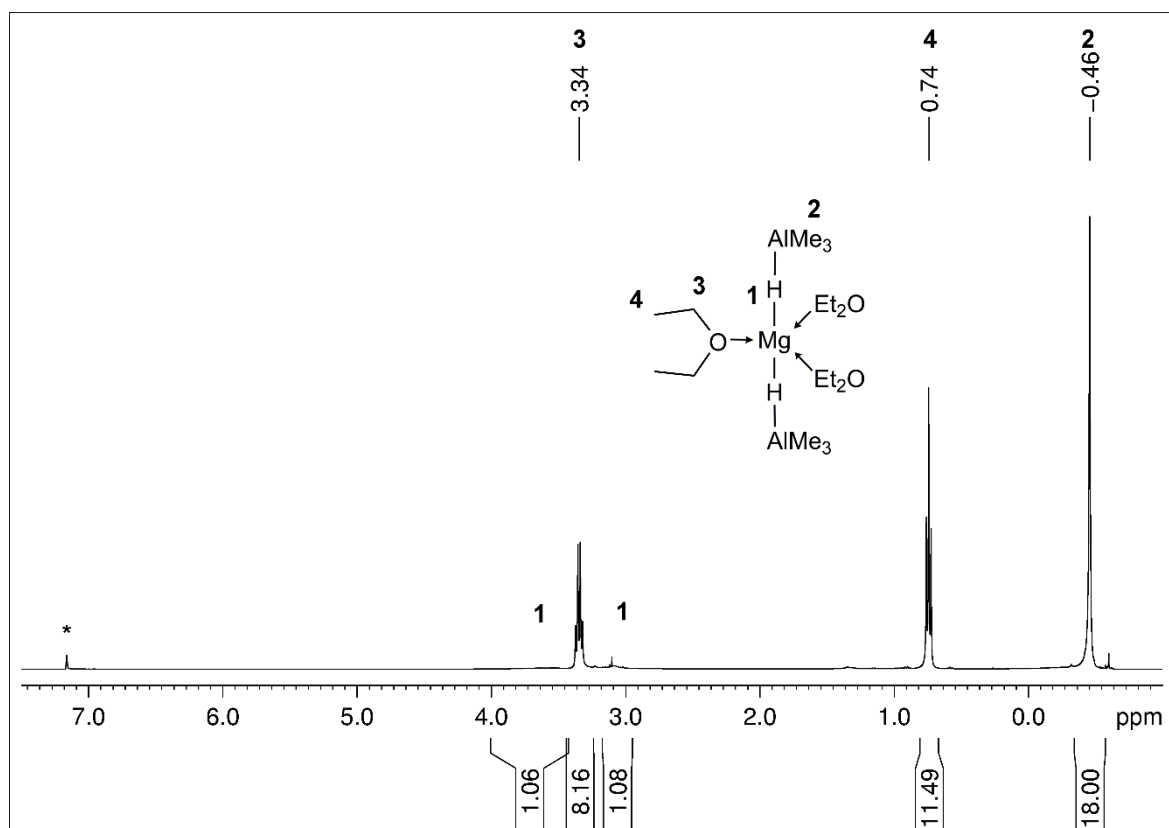

**Figure S3.**  $^1\text{H}$  NMR spectrum (400 MHz) of **2** in  $\text{toluene-}d_8$  at  $26\text{ }^\circ\text{C}$ .

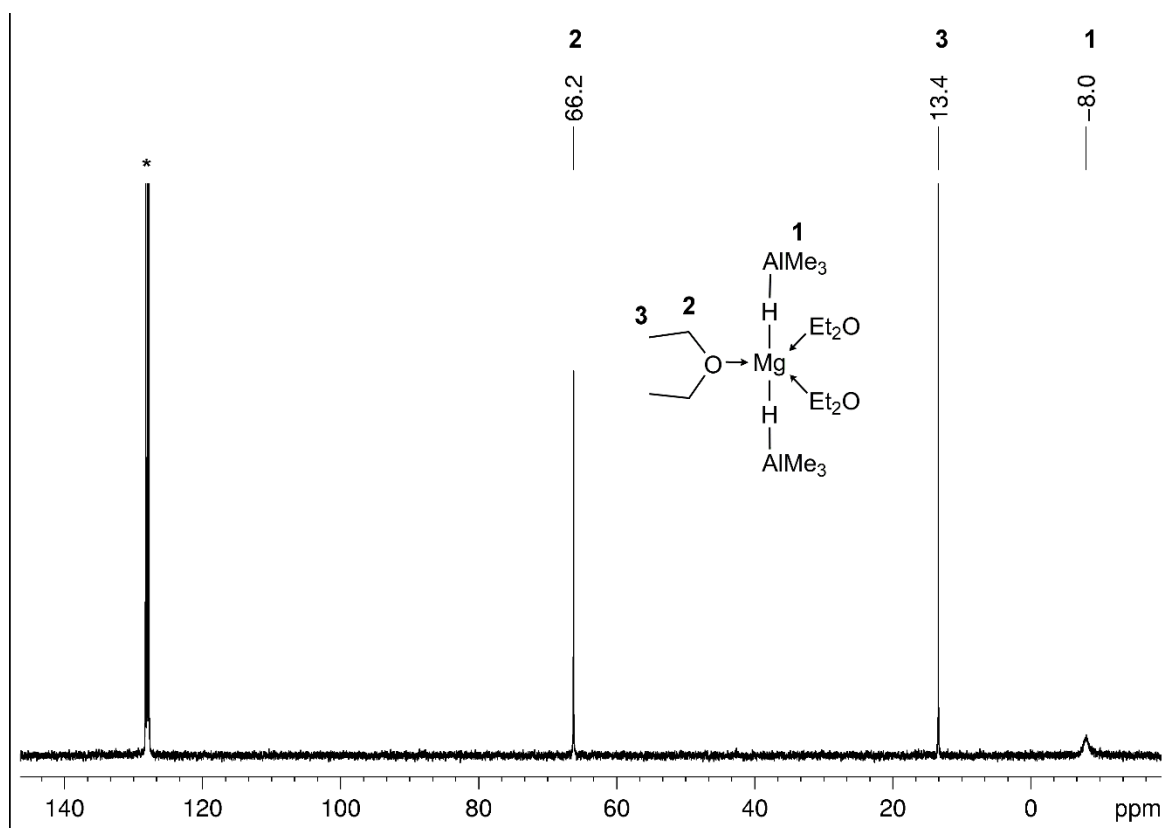

**Figure S4.**  $^{13}\text{C}\{^1\text{H}\}$  NMR spectrum (101 MHz) of **2** in  $\text{toluene-}d_8$  at  $26\text{ }^\circ\text{C}$ .

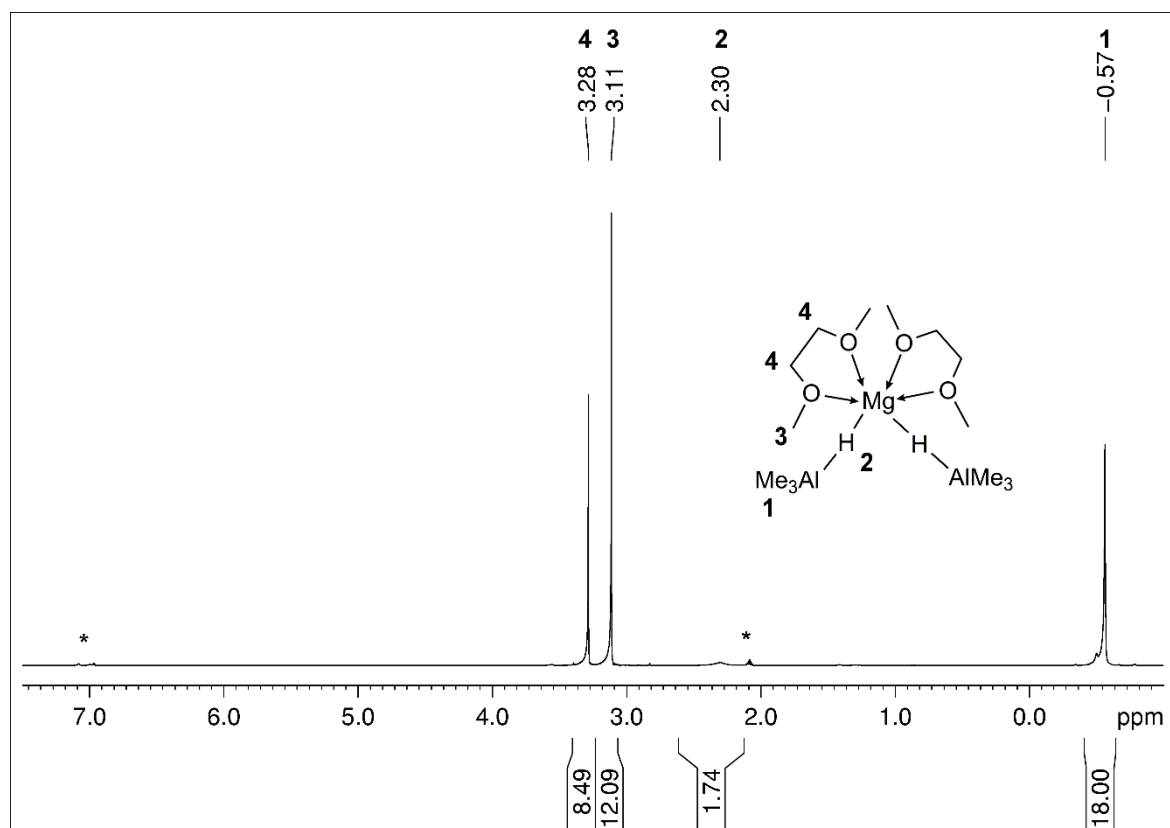

Figure S5.  $^1\text{H}$  NMR spectrum (400 MHz) of **3** in toluene- $d_8$  at 26 °C.

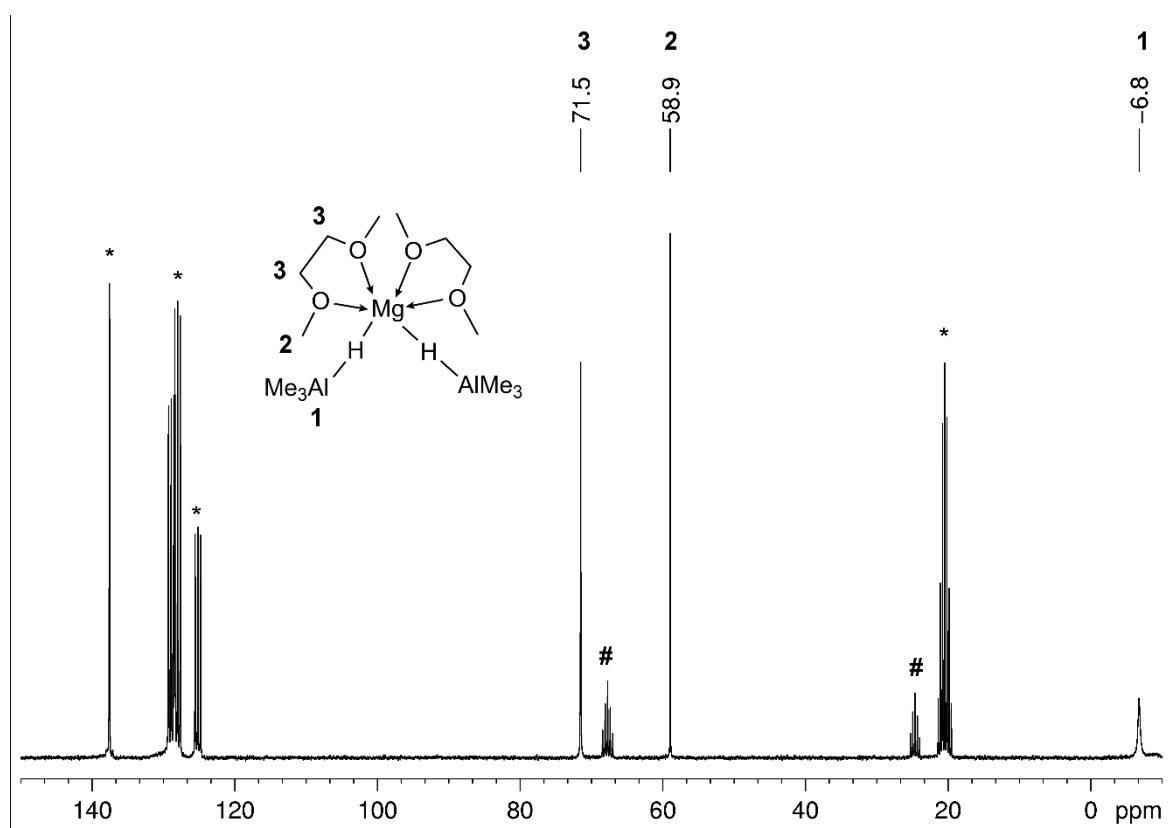

Figure S6.  $^{13}\text{C}\{^1\text{H}\}$  NMR spectrum (101 MHz) of **3** in toluene- $d_8$  at 26 °C.

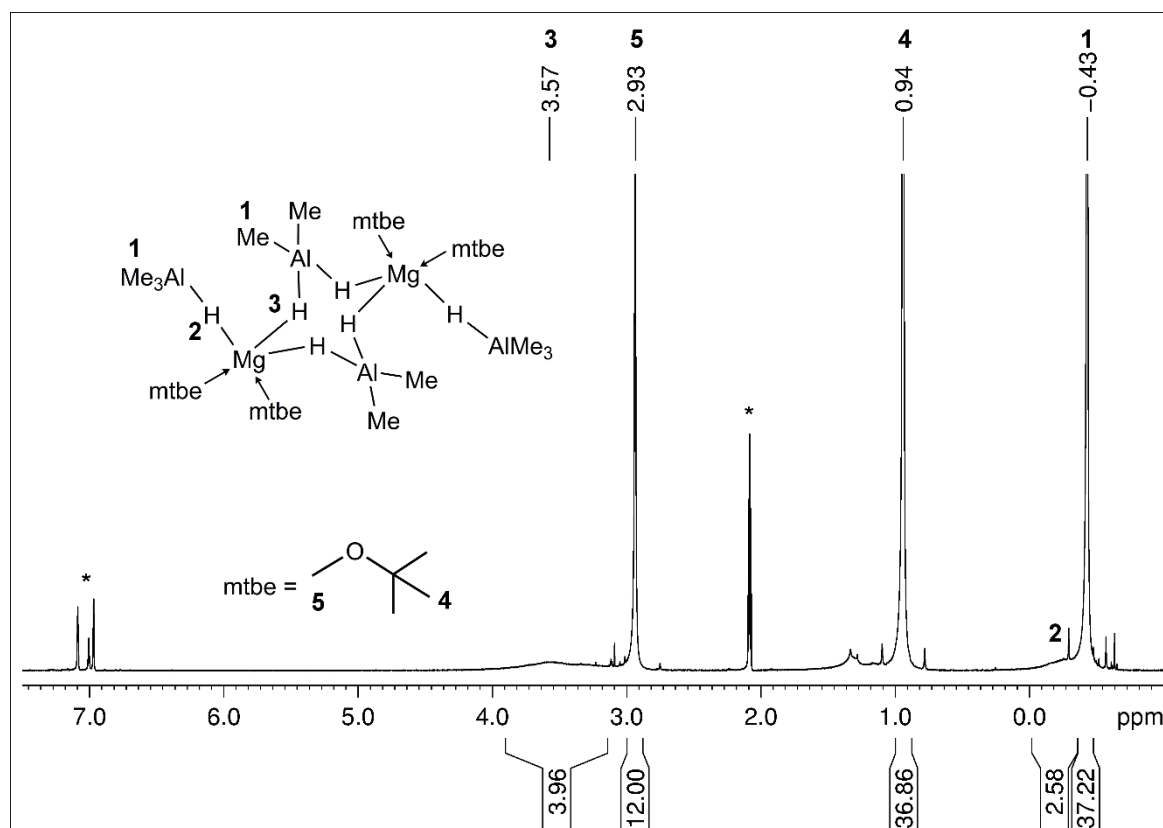

**Figure S7.**  $^1\text{H}$  NMR spectrum (400 MHz) of **4** in toluene- $d_8$  at 26 °C.

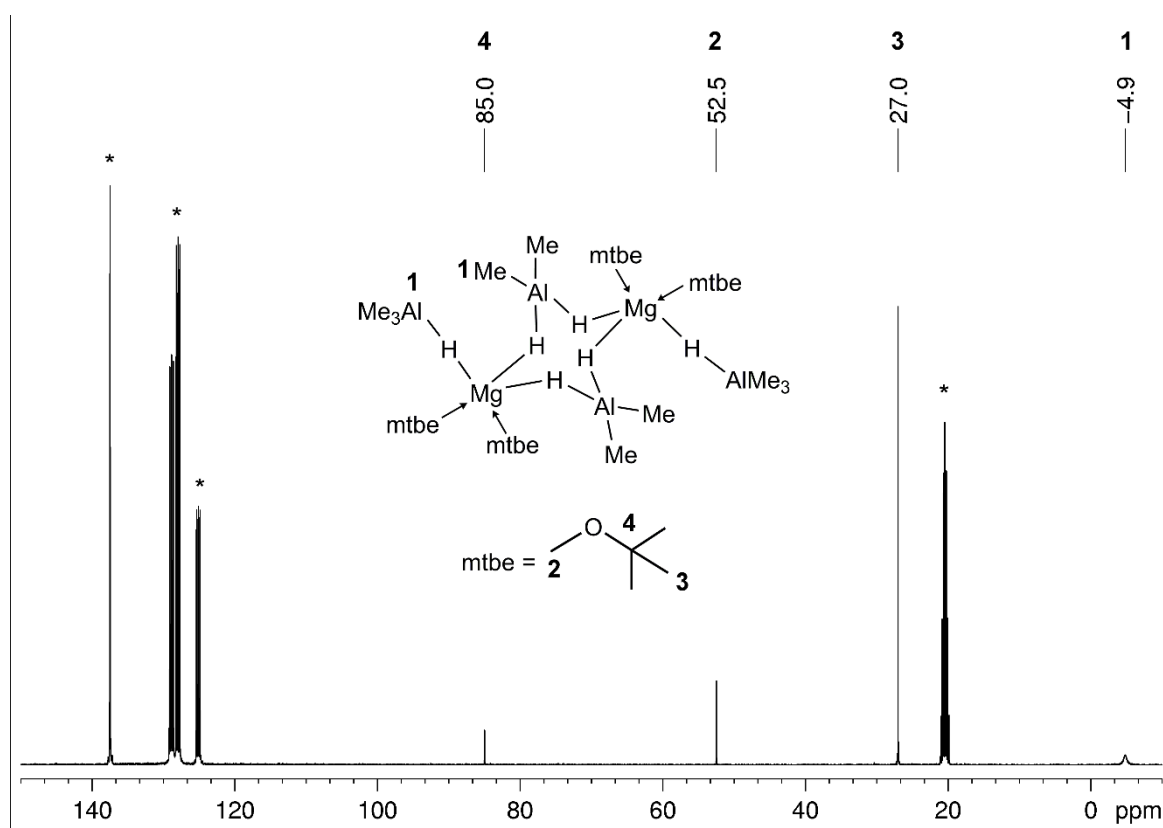

**Figure S8.**  $^{13}\text{C}\{^1\text{H}\}$  NMR spectrum (101 MHz) of **4** in toluene- $d_8$  at 26 °C.



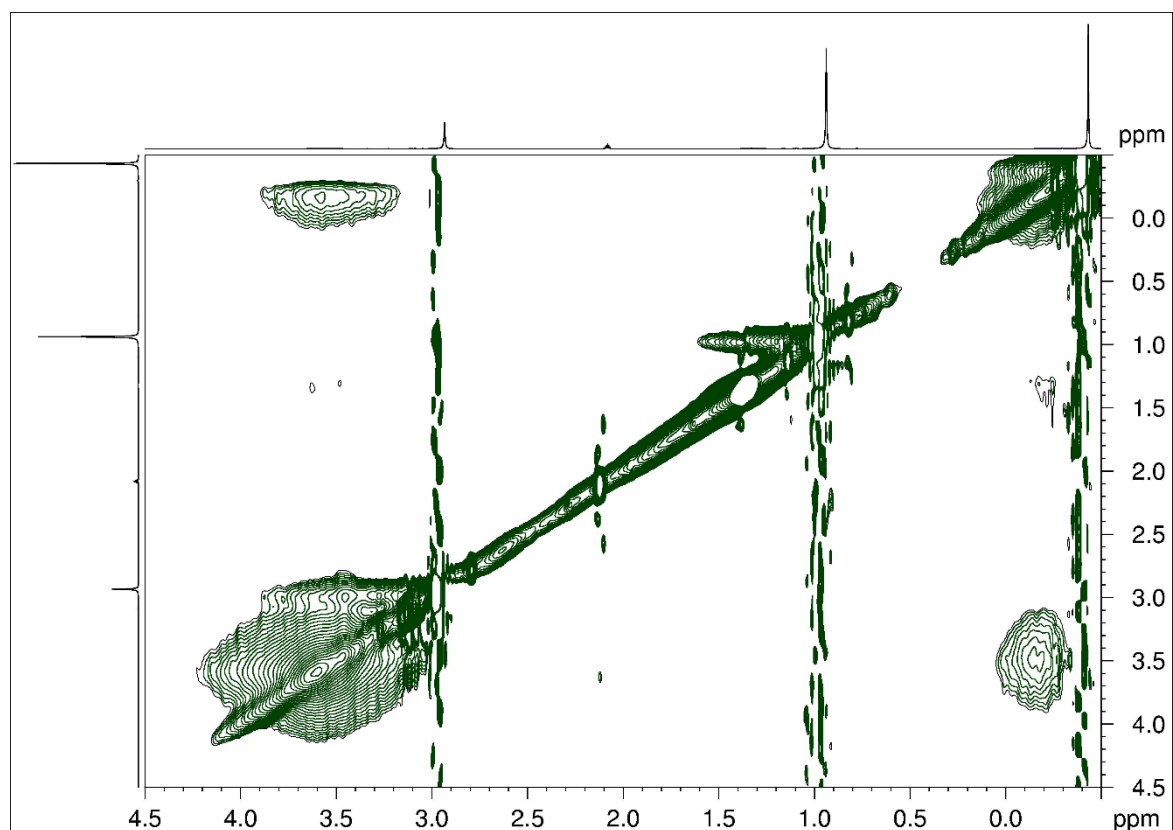

**Figure S9.**  $^1\text{H}$  EXSY NMR spectrum (400 MHz) of **4** in toluene- $d_8$  at 26 °C indicating hydrido exchange.

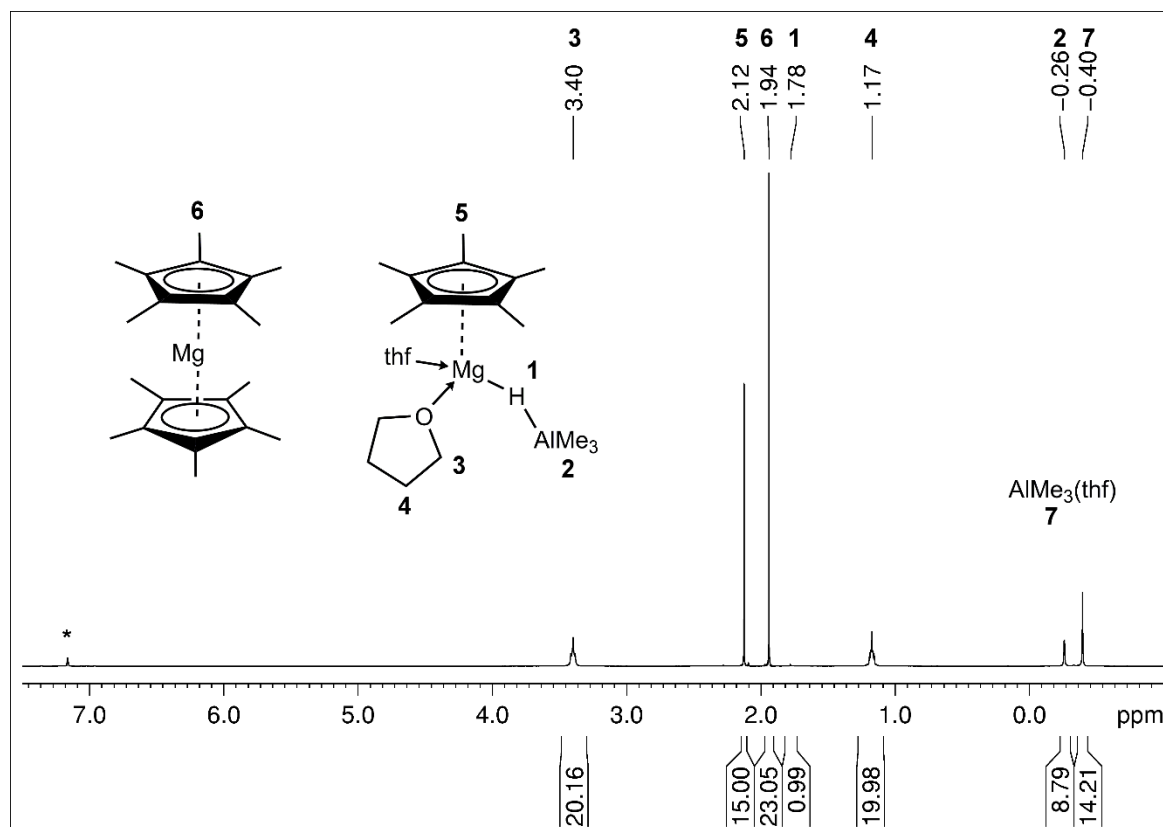

**Figure S10.**  $^1\text{H}$  NMR spectrum (400 MHz) of **5** in benzene- $d_6$  after 1 h at 26 °C.

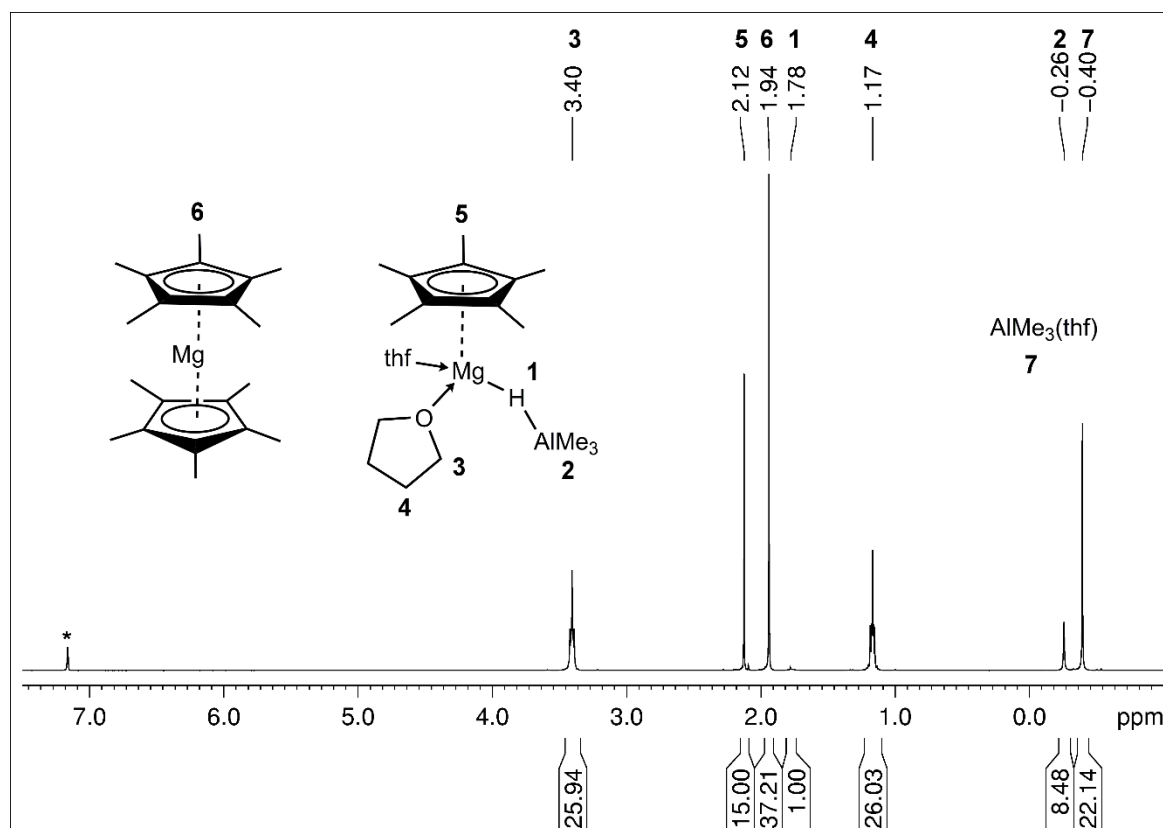

**Figure S11.**  $^1\text{H}$  NMR spectrum (400 MHz) of **5** in benzene- $d_6$  after 16 h at 26 °C.

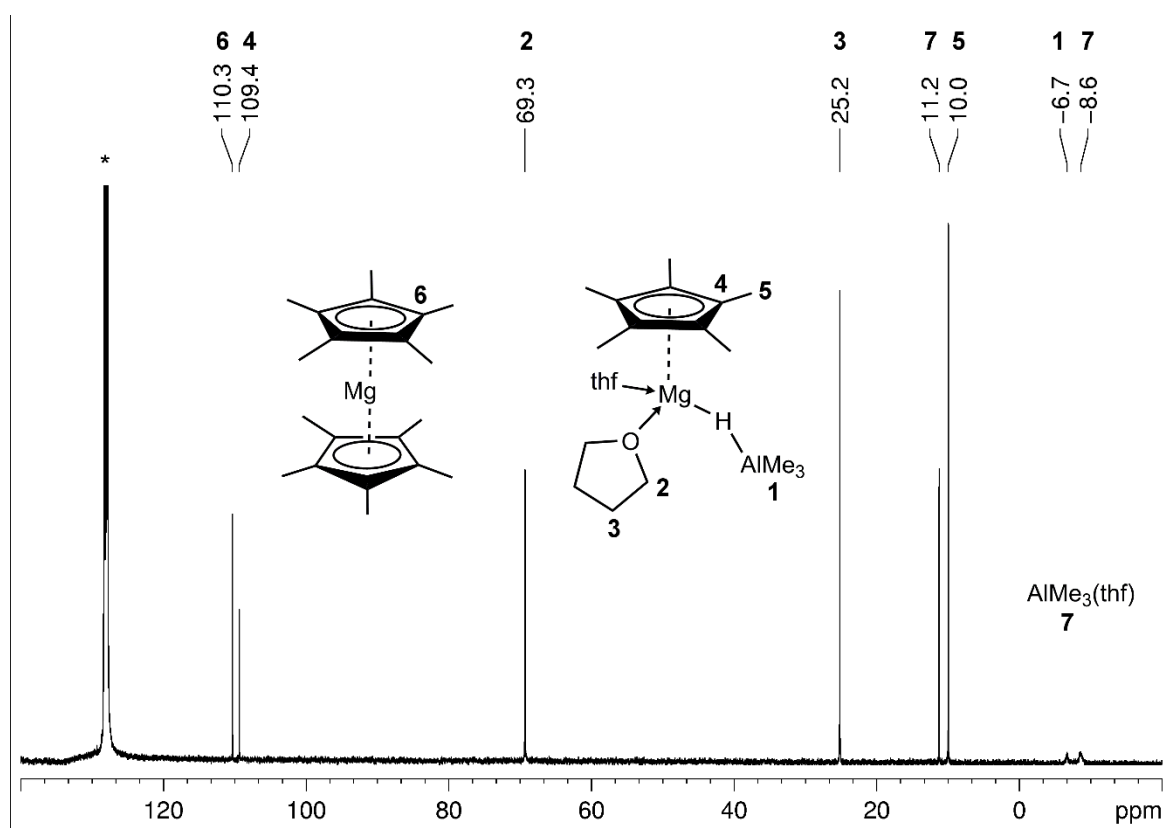

**Figure S12.**  $^{13}\text{C}\{^1\text{H}\}$  NMR spectrum (101 MHz) of **5** in benzene- $d_6$  overnight at 26 °C.

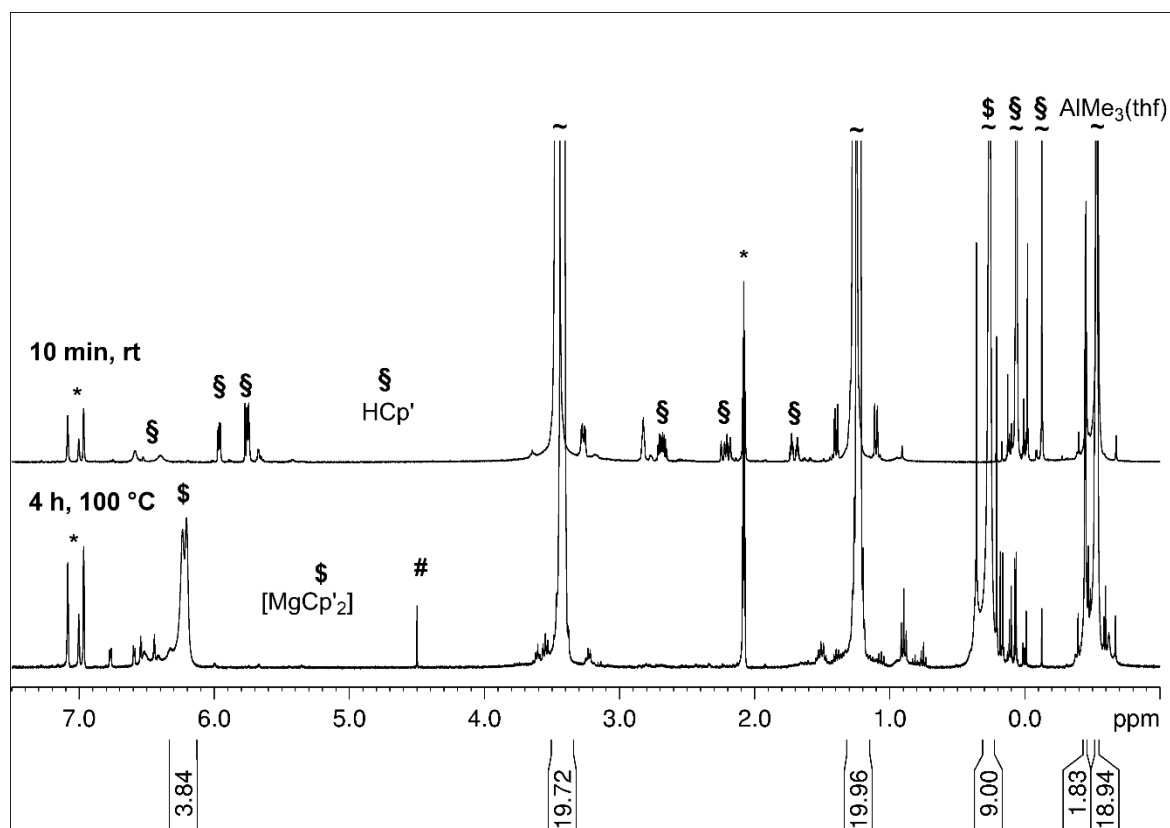

**Figure S13.** <sup>1</sup>H NMR spectra (400 MHz) of the protonolysis of **1** with HCp' in toluene-*d*<sub>8</sub> illustrating H<sub>2</sub> evolution (#).

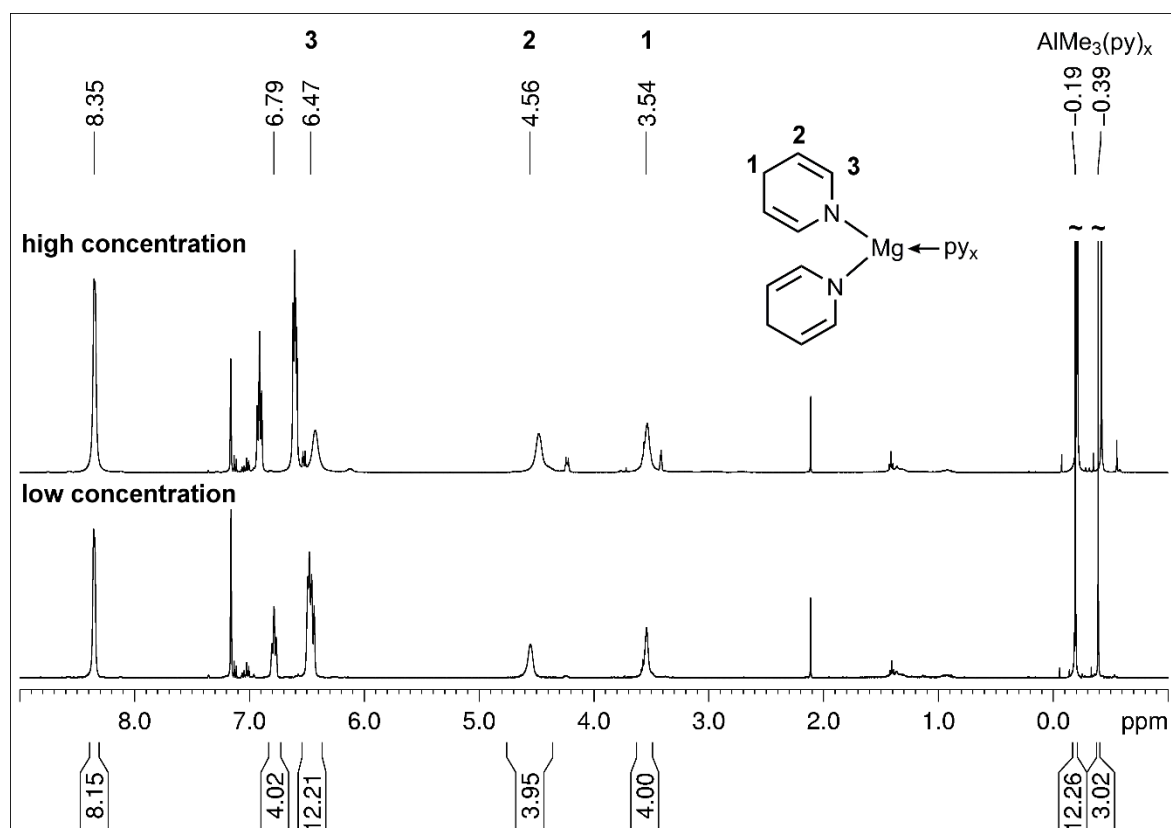

**Figure S14.** <sup>1</sup>H NMR spectrum (400 MHz) of [(py)<sub>x</sub>Mg(1,4-dihydropyridide)<sub>2</sub>] in benzene-*d*<sub>6</sub> at 26 °C.

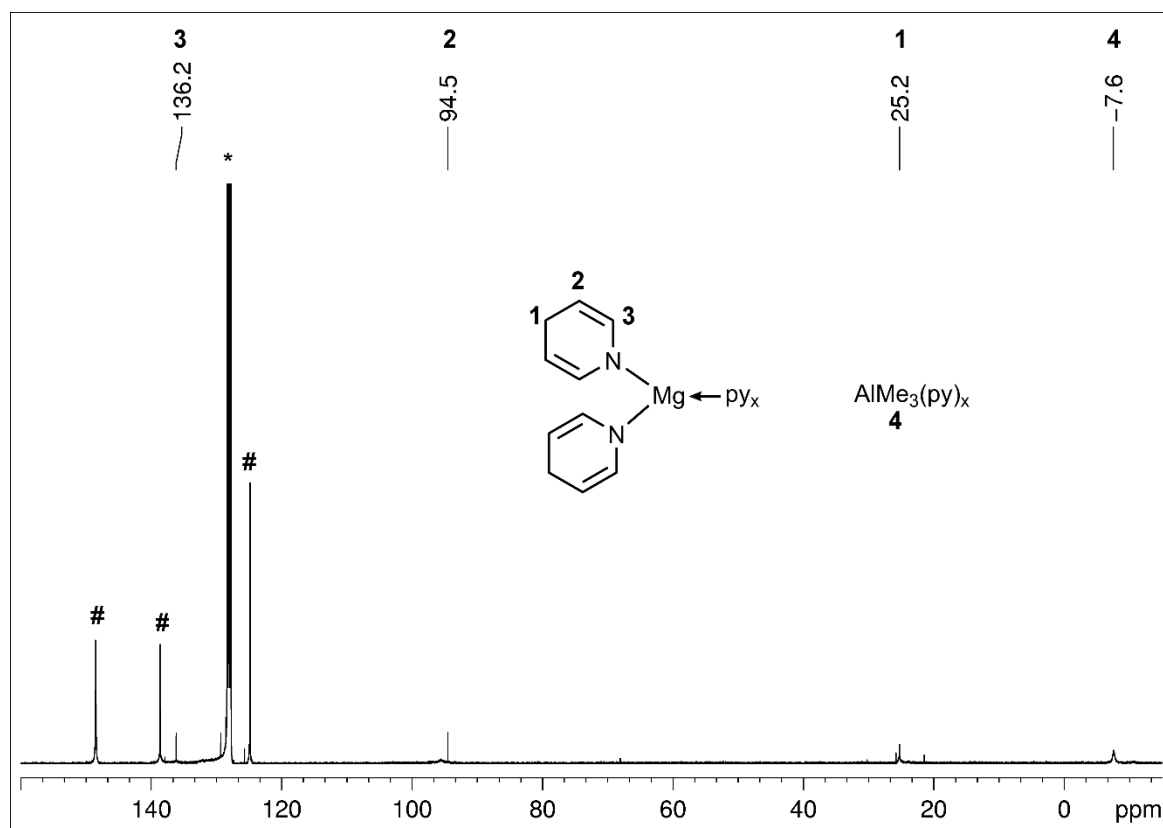

**Figure S15.**  $^{13}\text{C}\{^1\text{H}\}$  NMR spectrum (101 MHz) of  $[(\text{py})_x\text{Mg}(1,4\text{-dihydropyridide})_2]$  in benzene- $d_6$  at 26 °C. (# pyridine).

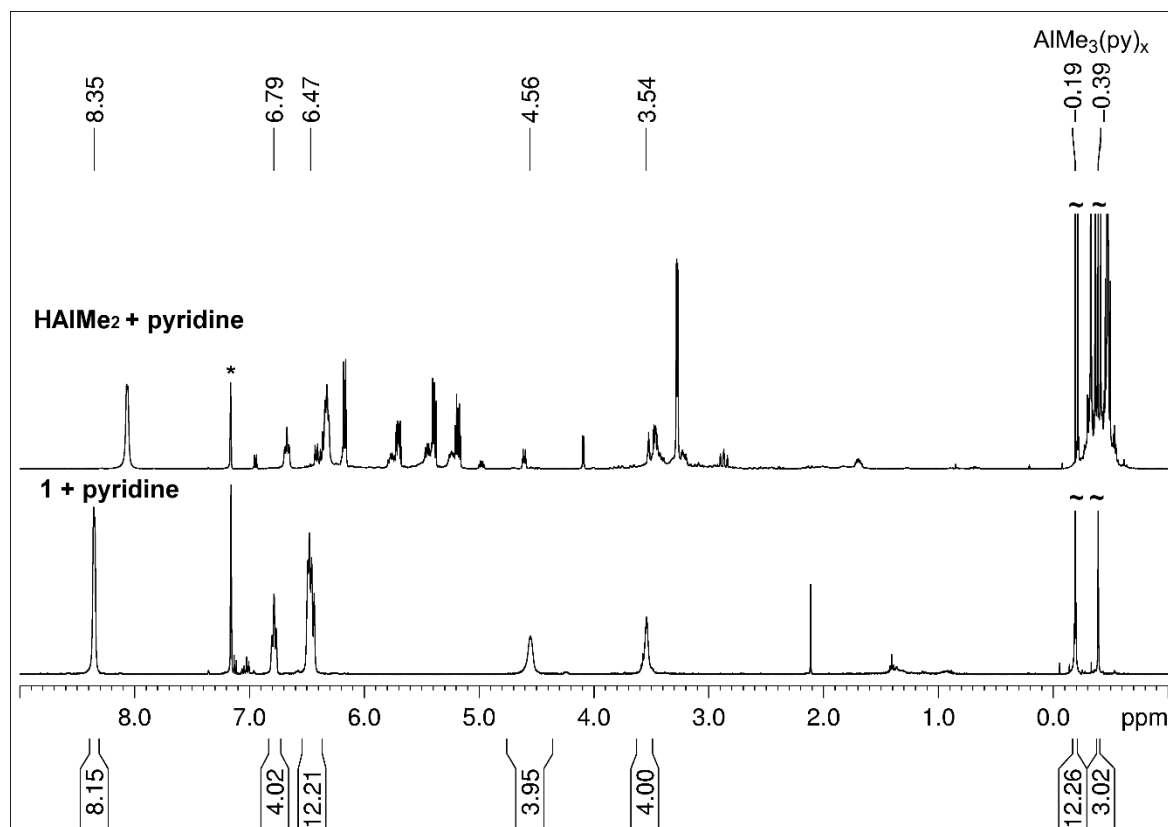

**Figure S16.**  $^1\text{H}$  NMR spectra (400 MHz) of pyridine reduction by **1** and  $\text{HAIme}_2$  in benzene- $d_6$  at 26 °C.

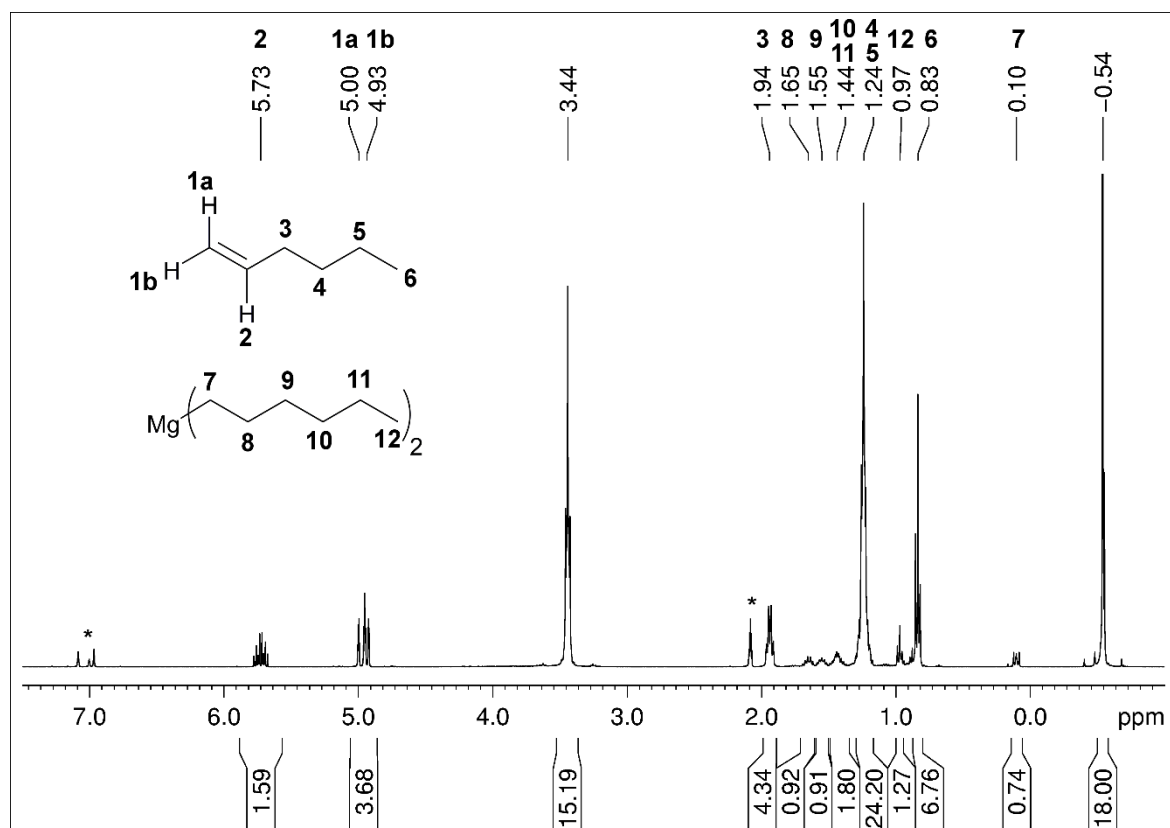

**Figure S17.**  $^1\text{H}$  NMR spectrum (400 MHz) of the hydromagnesation of 1-hexene with **1** in toluene- $d_8$  at 26°C (40 h, 130 °C).

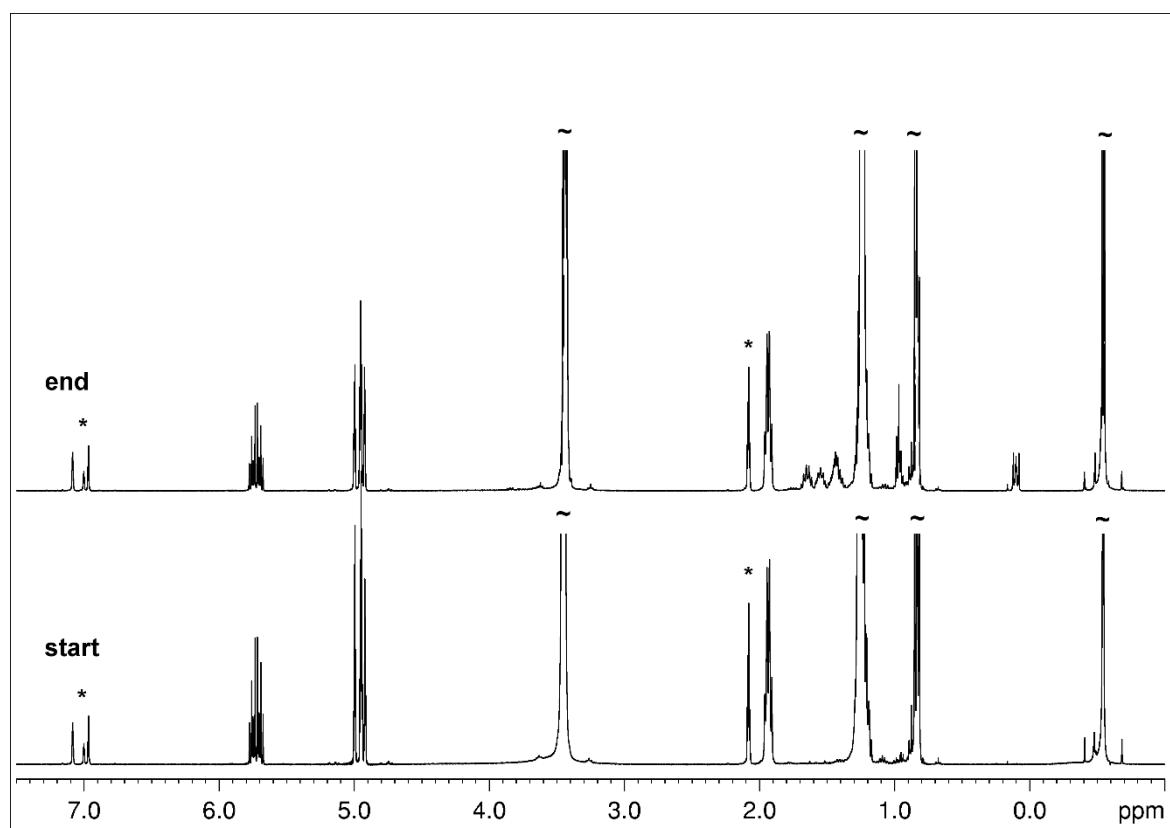

**Figure S18.**  $^1\text{H}$  NMR spectra (400 MHz) of the hydromagnesation of 1-hexene with **1** in toluene- $d_8$  at 26 °C.

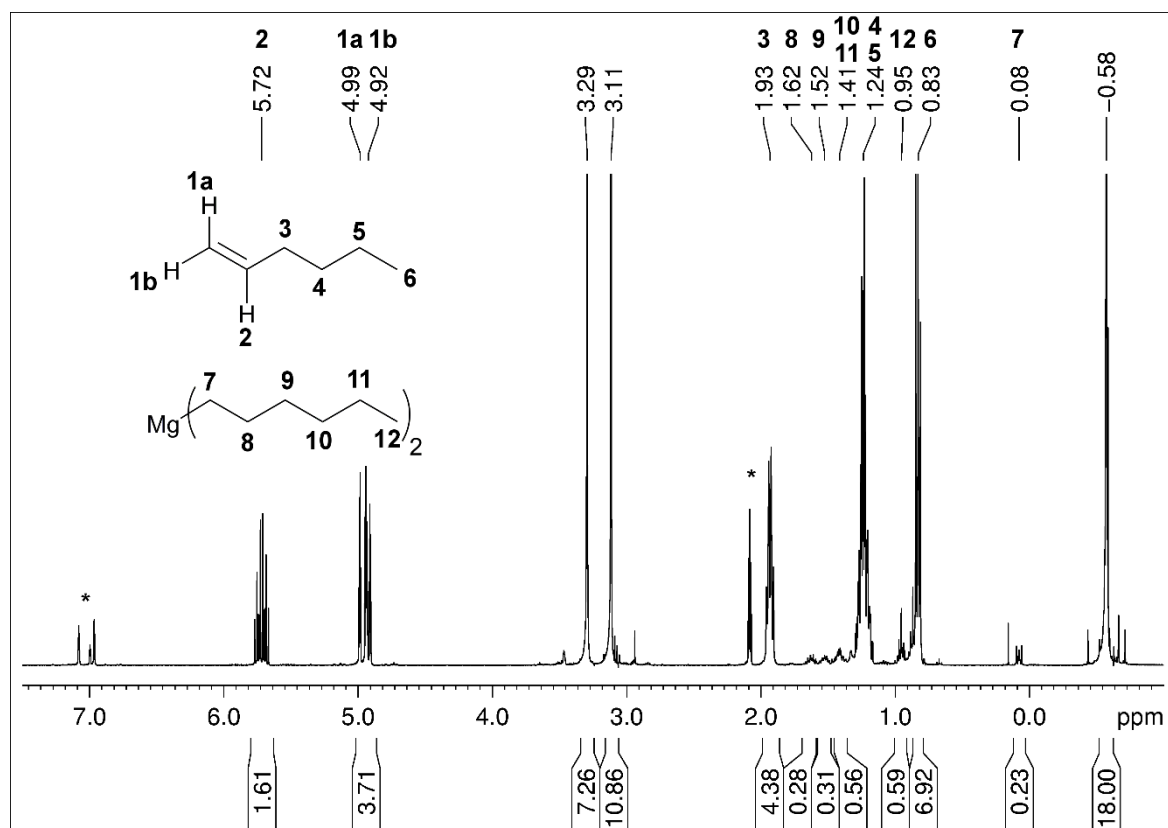

**Figure S19.** *In situ*  $^1\text{H}$  NMR spectrum (400 MHz) of the hydromagnesation of 1-hexene with **3** in  $\text{toluene-}d_8$  at  $26\text{ }^\circ\text{C}$  after 16 h at  $130\text{ }^\circ\text{C}$ .

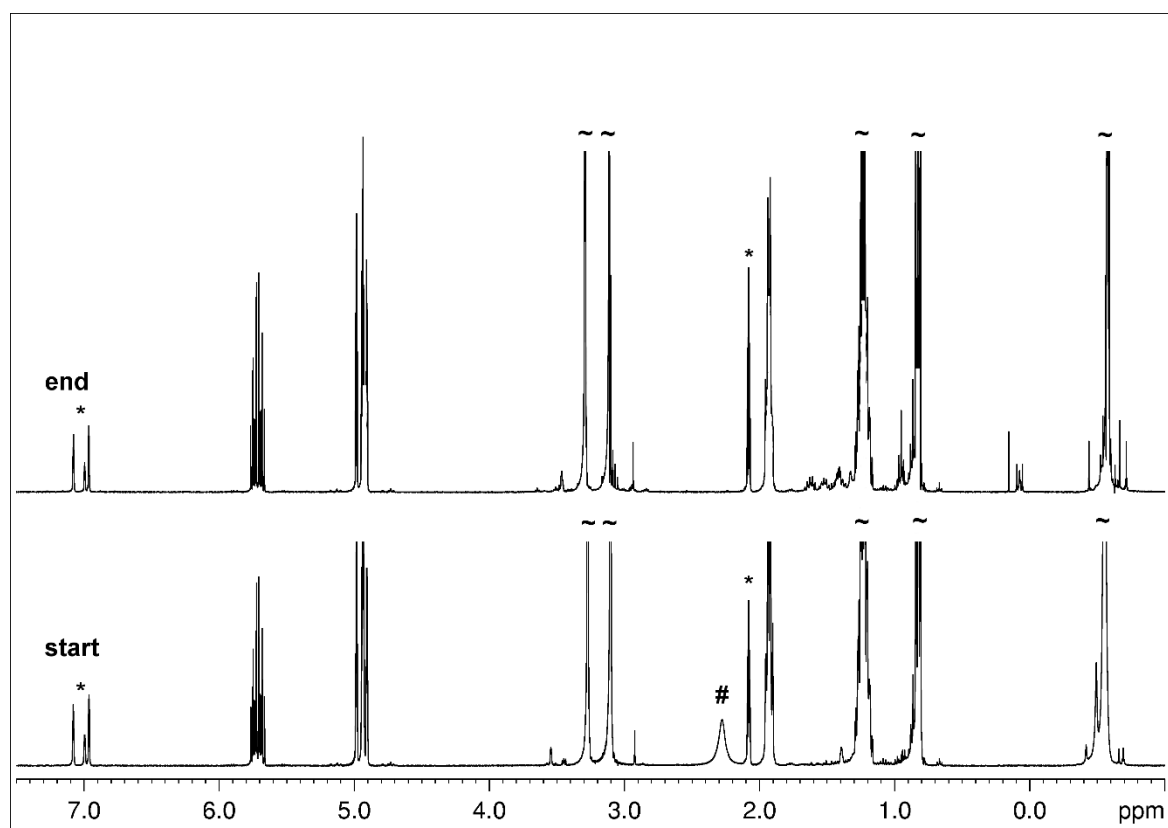

**Figure S20.**  $^1\text{H}$  NMR spectra (400 MHz) of the hydromagnesation of 1-hexene with **3** in  $\text{toluene-}d_8$  at  $26\text{ }^\circ\text{C}$  illustrating the decrease of Mg-H-Al species (#) and the product peaks.

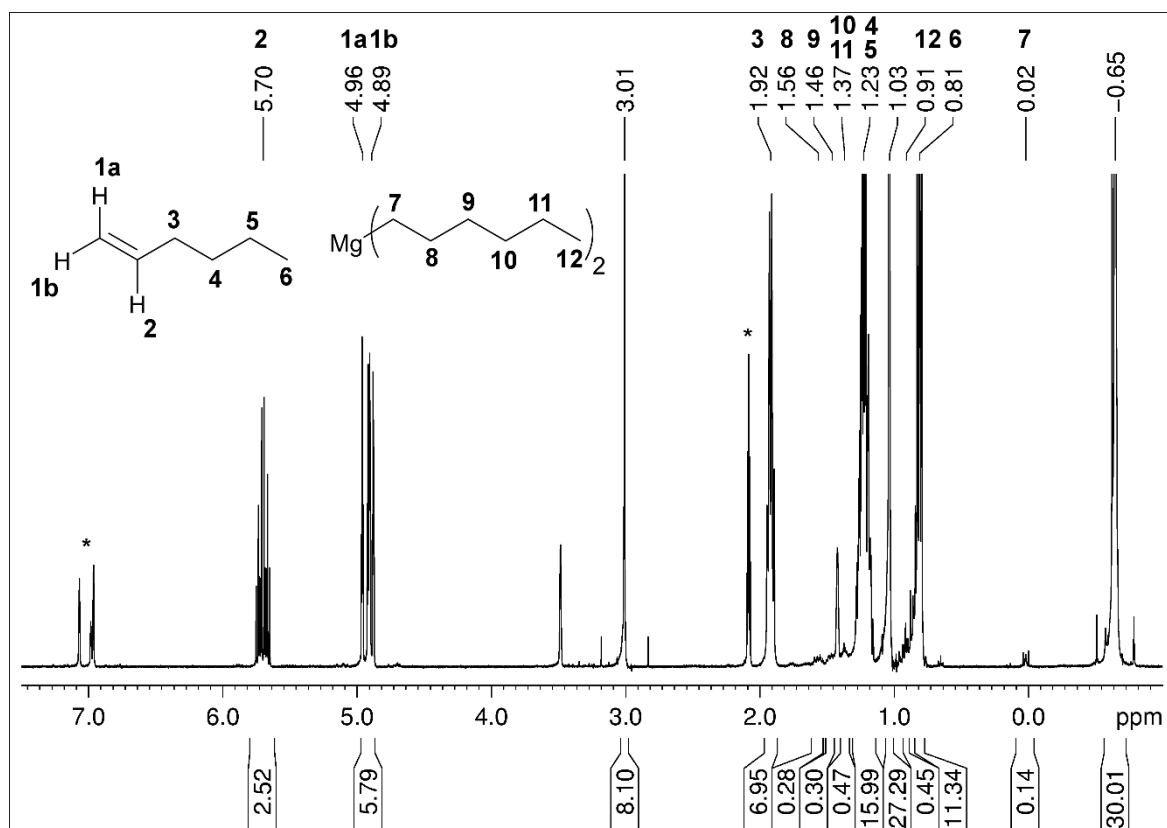

**Figure S21.** *In situ* <sup>1</sup>H NMR spectrum (400 MHz) of the hydromagnesation of 1-hexene with 4 in toluene-*d*<sub>8</sub> at 26 °C after 16 h at 130 °C.

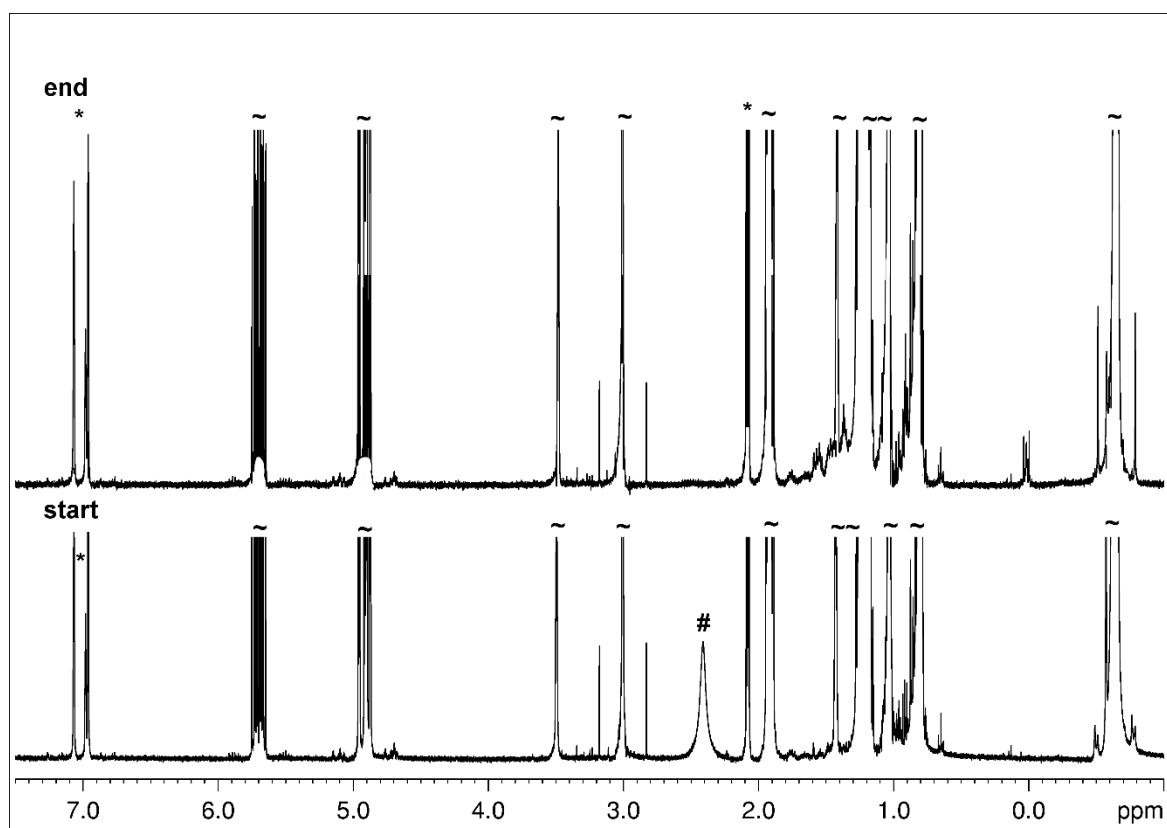

**Figure S22.** <sup>1</sup>H NMR spectra (400 MHz) of the hydromagnesation of 1-hexene with 4 in toluene-*d*<sub>8</sub> at 26 °C illustrating the decrease of Mg-H-Al species (#) and the product peaks.
